# Supplementary material for: RIBOSE PHOSPHATE ISOMERSASE 1 Influences Root Development by Acting on Cell Wall Biosynthesis, Actin Organization, and Auxin Transport in Arabidopsis
Source: PubMed Central journal article supplement (PMC6960261; doi:10.3389/fpls.2019.01641), 2020-01-08
Supplement: DataSheet_1.pdf [file DataSheet_1.pdf]

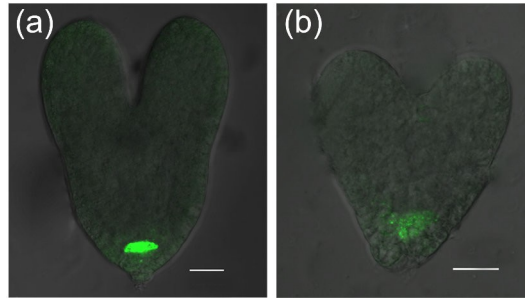

**Figure S1.** The expression of **WOX5** is affected in the *dpr3* mutant.

(a) The expression of *WOX5<sub>pro</sub>:GFP* in the embryo of **wild type**.

(b) The expression of *WOX5<sub>pro</sub>:GFP* in the embryo of *dpr3* mutant.

Bars = 20  $\mu$ m.

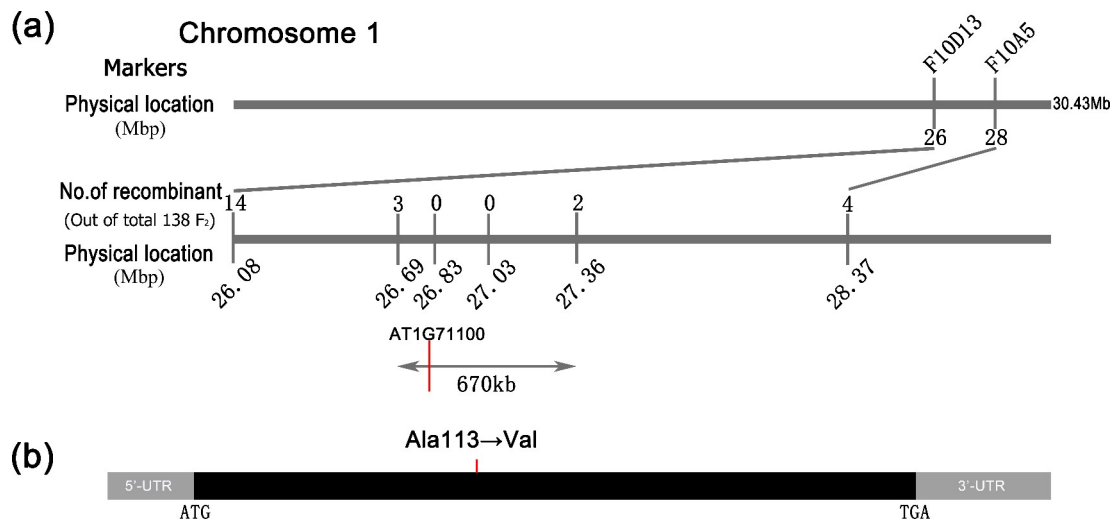

**Figure S2.** Map-based cloning of *DPR3* gene.

(a) Initial mapping located the *dpr3* mutation to the lower arm of chromosome 1, in a region between the two markers F10D13 and F10A5. Fine mapping located the mutation in a region between 26.69 Mb and 28.37 Mb. Sequencing analysis revealed that a single base pair mutation in the locus AT1G71100 (*RPI1*), leading to a predicted amino acid change Ala113Val.

(b) Gene structure of *RPI1*. The black box represents **coding region** and gray boxes indicate untranslated regions (UTRs). The vertical line represents the mutation position.

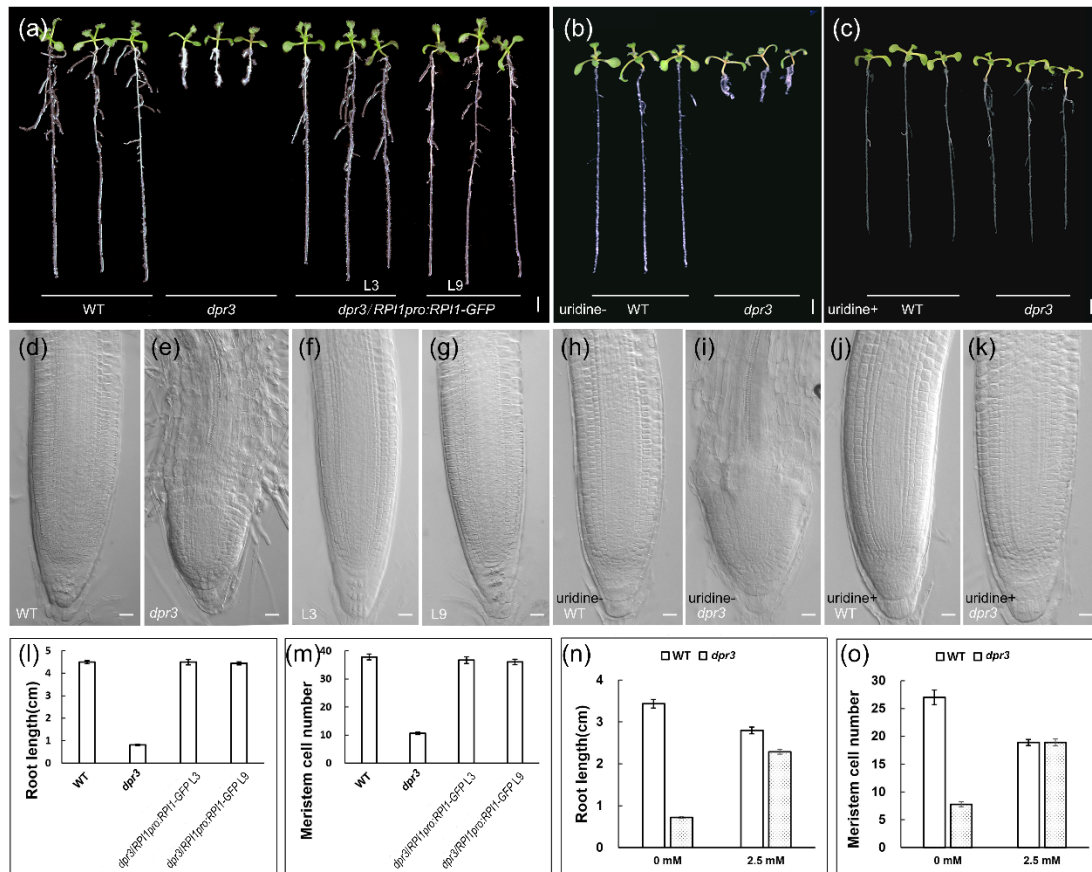

**Figure S3.** The *RPI1<sub>pro</sub>:RPI1-GFP* transgene and exogenous uridine rescue the root phenotypes of *dpr3* mutants.

(a) From left to right, phenotypes of **wild type**, *dpr3* and *dpr3/RPI1<sub>pro</sub>:RPI1-GFP* transgenic (L3, L9 lines) seedlings at 10 DAG.

(b, c) Phenotypes of **wild type** (left) and *dpr3* (right) at 9 DAG without (b) and with (c) 2.5 mM uridine supplemented in the plates.

(d-g) Root tips of the **wild type** (d), *dpr3* (e) and *dpr3/RPI1<sub>pro</sub>:RPI1-GFP* transgenic plants (L3, L9 lines) at 10 DAG.

(h-k) Root tips of the **wild type** (h) and *dpr3* (i) seedlings at 9 DAG without (h,i) and with (j,k) 2.5 mM uridine supplemented in the plates.

(l) Primary root lengths of the **wild type**, *dpr3*, and *dpr3/RPI1<sub>pro</sub>:RPI1-GFP* transgenic plants (lines L3 and L9) at 10 DAG. Data shown are average and SD (n = 32).

(m) Meristem cell number of the indicated genotypes at 10 DAG. Data shown are average and SD (n = 28).

(n) Primary root lengths of the indicated plants without or with 2.5 mM uridine at 9 DAG.

Data shown are average and SD (n = 30).

(o) Meristem cell number of indicated plants without or with 2.5 mM uridine at 9 DAG (n = 30).

Bars = 5 mm in (a-c) and 20  $\mu$ m in (d-k).

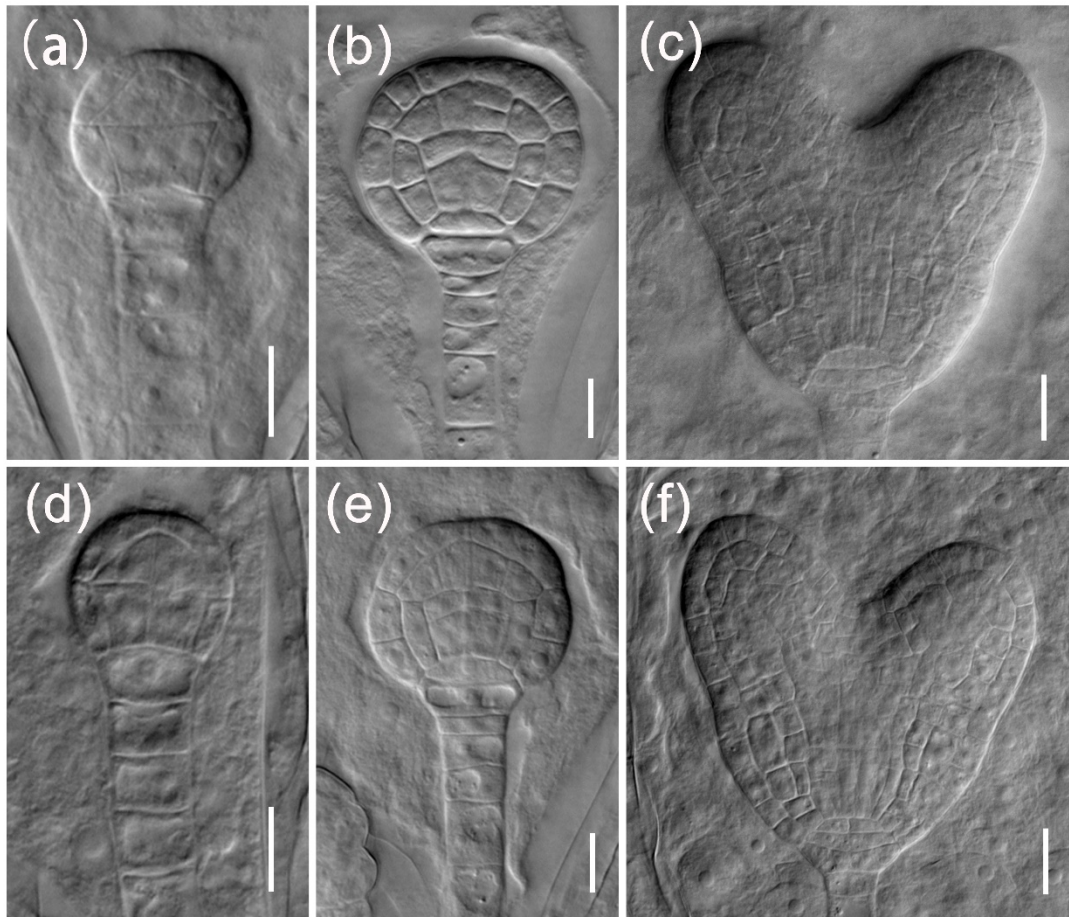

**Figure S4.** The *RPI1<sub>pro</sub>:RPI1-GFP* transgene rescue the embryo phenotypes of *dpr3* mutants.

**(a-c)** Wild type embryos at 16-cell (a), globular (b) and heart (c) stages.

**(d-f)** Embryos of *dpr3/RPI1<sub>pro</sub>:RPI1-GFP* transgenic plants at 16-cell (d), globular (e) and heart (f) stages.

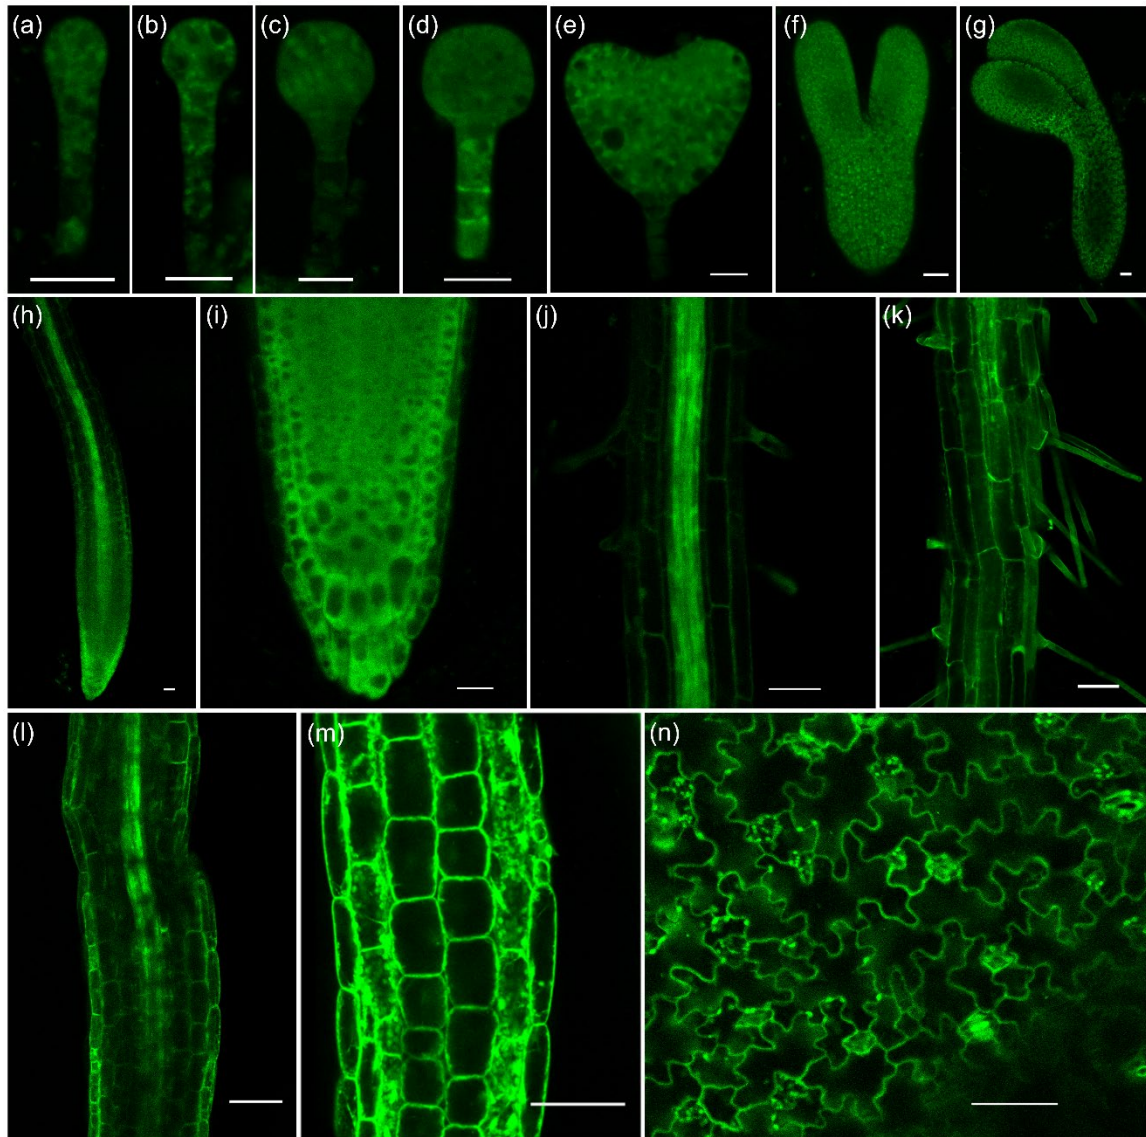

**Figure S5.** *RPI1* expression pattern and subcellular localization.

**(a–g)** *RPI1<sub>pro</sub>:RPI1-GFP* expression pattern in the embryos from octant to bent stages. **(h–k)** *RPI1<sub>pro</sub>:RPI1-GFP* is expressed in the root tip (h) and mature zone (j, k). *RPI1-GFP* is localized in the cytoplasm of the root cells (i).

**(l, m)** *RPI1<sub>pro</sub>:RPI1-GFP* is expressed in the hypocotyl.

**(n)** *RPI1<sub>pro</sub>:RPI1-GFP* is expressed in pavement and guard cells of cotyledon.

Bars = 20 μm.

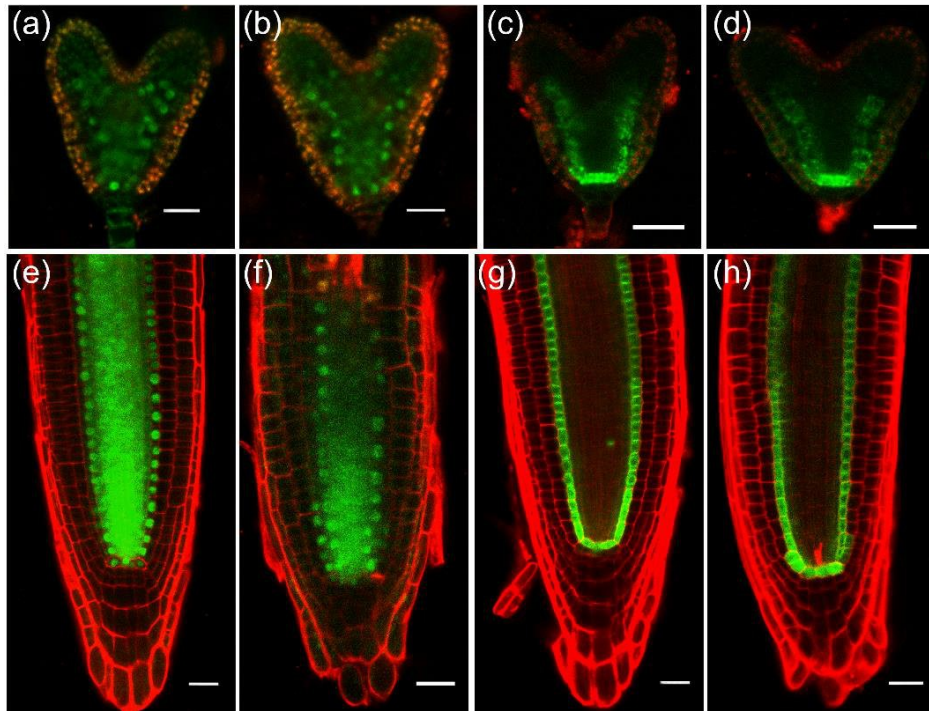

**Figure S6.** *RPI1* does not affect the expression of **SHR** and *SCR* in embryos and roots.

**(a, b)** *SHR<sub>pro</sub>:SHR-GFP* expression in **wild type** (a) and *rpi1* (b) embryos.

**(c, d)** *SCR<sub>pro</sub>:GFP* expression in **wild type** (c) and *rpi1* (d) embryos.

**(e, f)** *SHR<sub>pro</sub>:SHR-GFP* expression in the roots of 4-d-old **wild type** (e) and *rpi1* (f) seedlings.

**(g, h)** *SCR<sub>pro</sub>:GFP* expression in the roots of 4-d-old **wild type** (g) and *rpi1* (h) seedlings.

Bars = 20  $\mu$ m.

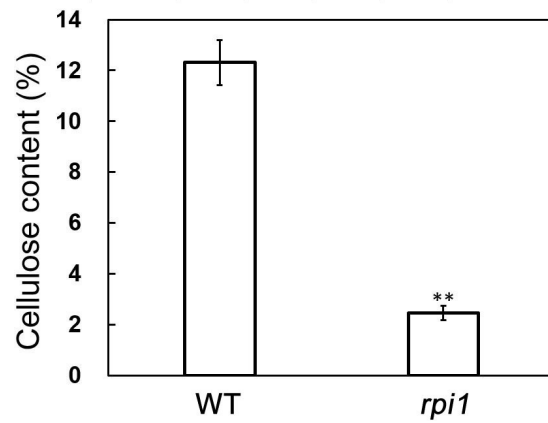

**Figure S7.** Cellulose content is decreased in the *rpi1* mutant.

Cellulose content is calculated as the percentage of cellulose amount relative to dry weight of 8-d-old seedlings. Error bars indicate  $\pm$ SD of three biological replicates. Asterisks indicate statistically significant differences in cellulose content between *rpi1* mutant and WT determined by Student's *t*-test (\*\*  $p < 0.01$ ).

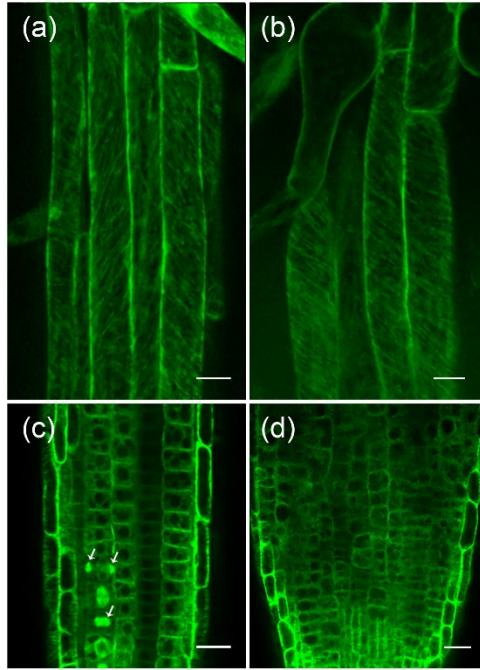

**Figure S8.** Microtubule arrays are not affected in *rpi1* mutant.

**(a-b)** *35S<sub>pro</sub>:GFP-tubulin* expression pattern in root mature zone of 4-d-old (a) wild type (b) *rpi1* seedlings.

**(c-d)** *35S<sub>pro</sub>:GFP-tubulin* expression pattern in root mature zone of 4-d-old (c) wild type (d) *rpi1* seedlings. Arrows indicate phragmoplast-enriched microtubules.

Bars = 20  $\mu$ m.

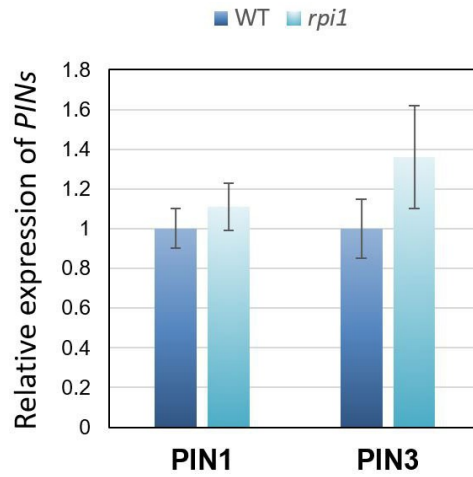

**Figure S9.** The mRNA levels of *PIN1* and *PIN3* are not significantly affected in *rpi1* mutant.

Relative expression of *PIN1* and *PIN3* in 5-d-old **wild type** (WT) and *rpi1* roots, as determined by qRT-PCR. Data represent means $\pm$ SD (n=3).



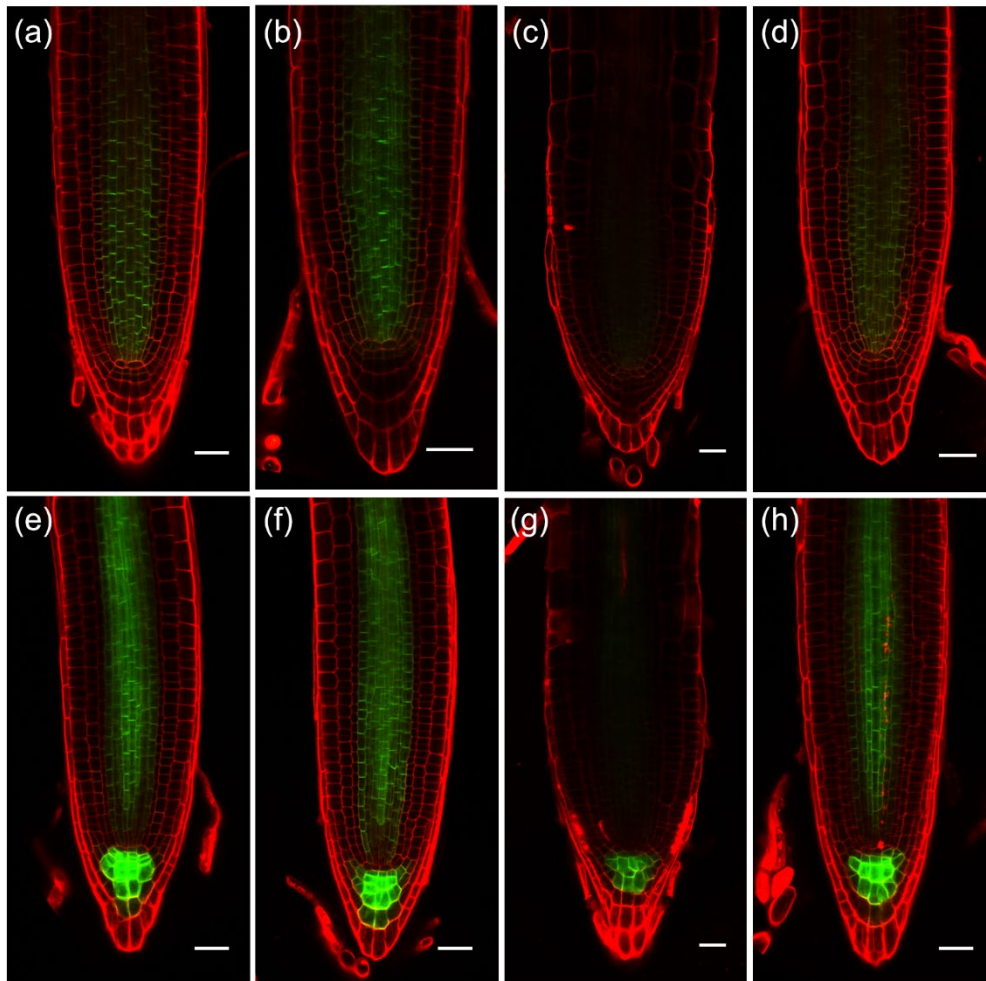

**Figure S10.** The expression of *PIN1<sub>pro</sub>:PIN1-GFP* and *PIN3<sub>pro</sub>:PIN3-GFP* in *rpi1* mutant could be rescued by uridine.

**(a-d)** *PIN1<sub>pro</sub>:PIN1-GFP* expression pattern in 4-d-old (a, b) wild type and (c, d) *rpi1* root tips (b, d) treated without (a, c) and with (b,d) 2.5 mM uridine.

**(e-h)** *PIN3<sub>pro</sub>:PIN3-GFP* expression pattern in 4-d-old (e, f) wild type and (g, h) *rpi1* root tips (f, h) treated without (e, g) and with (f, h) 2.5 mM uridine.

Bars = 20  $\mu$ m.

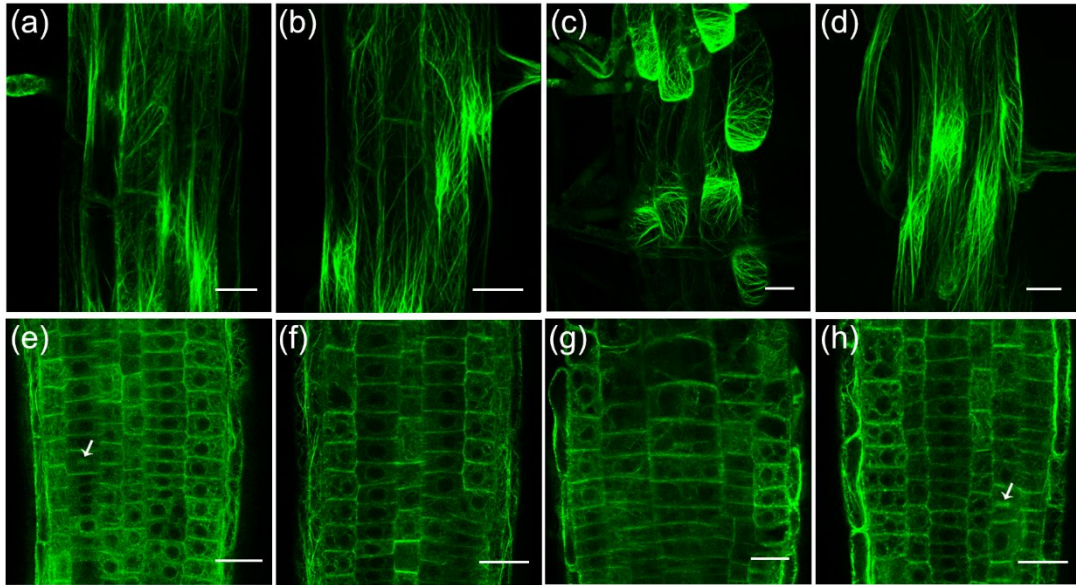

**Figure S11.** Actin filament organization in *rpi1* mutant was rescued by uridine.

(a-h) Actin filament organization indicated by *35S<sub>pro</sub>:ABD2-GFP* in 4-d-old (a, b, e, f) wild type and (c, d, g, h) *rpi1* root tips (e-h) in the meristem zone and (a-d) mature zone (b, d, f, h) treated without (a, c, e, g) and with (b, d, f, h) 2.5 mM uridine. Arrows indicate phragmoplast-enriched actin filaments. Each figure in (a-d) is a maximum projection of 5 slices z-stack.

Bars = 50 μm in (a-d) and 50 μm in (e-h).

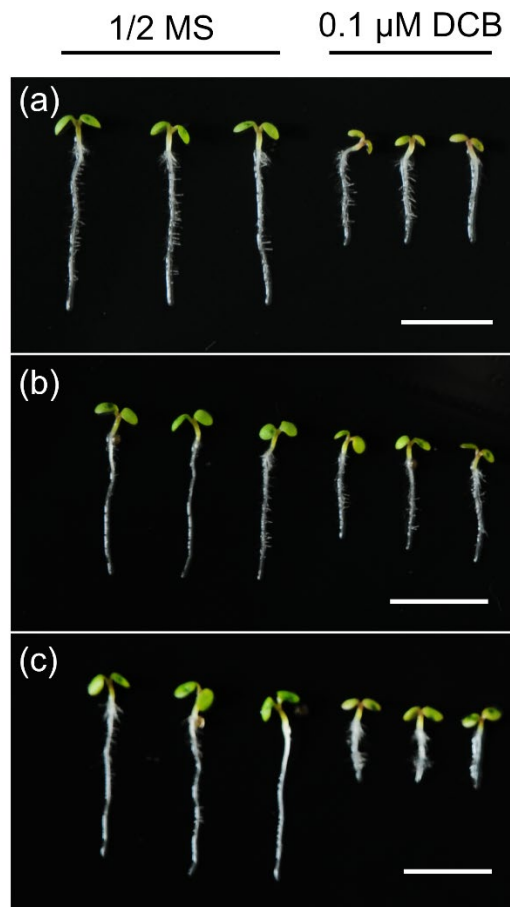

**Figure S12.** 2,6-dichlorobenzonitrile (DCB) treatment inhibits root growth of wild type seedlings bearing *PIN1<sub>pro</sub>:PIN1-GFP*, *PIN3<sub>pro</sub>:PIN3-GFP* and *35S<sub>pro</sub>:ABD2-GFP* markers.

**(a-c)** Primary root length of 4-d-old wild type seedlings expressing (a) *PIN1<sub>pro</sub>:PIN1-GFP*, (b) *PIN3<sub>pro</sub>:PIN3-GFP* and (c) *35S<sub>pro</sub>:ABD2-GFP* treated by 0.1  $\mu$ M DCB.

Bars = 5 mm.

**Table S1.** Primers used in this study.

|                     |                                                  |                                                                     |
|---------------------|--------------------------------------------------|---------------------------------------------------------------------|
| Map-based cloning   | F10D13-F<br>F10D13-R                             | 5'- GTGGTTGCCTACAGCTTTA -3'<br>5'- AGAAGAATGACGACAATAGT -3'         |
|                     | F15H11-F<br>F15H11-R                             | 5'- GTGAAAACCTGAAACGTATGT -3'<br>5'- TACCGGCCTCAATTTGAC -3'         |
|                     | F23N20-F<br>F23N20-R                             | 5'- TTGTTTTCCATTTGGTTAG -3'<br>5'- TTTGATGGTCGTGTTAAG -3'           |
|                     | F17M19-F<br>F17M19-R                             | 5'- GTTTTTGTGGGGGAATCA -3'<br>5'- CAATCAGAACCAGACTCATA -3'          |
|                     | F28P22-F<br>F28P22-R                             | 5'- TGTTTTTTAGGACAAATGGCG -3'<br>5'- CTCCAGTTGGAAGCTAAAGGG -3'      |
|                     | F10A5-F<br>F10A5-R                               | 5'- CAAAACCTCCCATCTTGCTTCA -3'<br>5'- CCGGTGGATATCGACTTAGG -3'      |
| Vector construction | RPI1 <sub>pro</sub> -F<br>RPI1 <sub>pro</sub> -R | 5'- CTCACCGTTGAGACTACTG -3'<br>5'- TGTACGCGACTTGCTTTGTGA -3'        |
|                     | RPI1 cDNA-F<br>RPI1 cDNA -R                      | 5'- ATGGGTTCTGCATTCGATCCCC -3'<br>5'- TCCAAACCTATCCTTGACGGTAACA -3' |
| qRT-PCR             | PIN1-F<br>PIN1-R                                 | 5'-TGGAAGACAACCTTTGGAAACT-3'<br>5'-TGAAGCATTAGAACGACGAACA-3'        |
|                     | PIN3-F<br>PIN3-R                                 | 5'-CAAGTGGAGATTTTCGGAGGA-3'<br>5'-GCGTCTTTTGGTCTCTCTGC-3'           |

**Table S2.** Quantitative analysis of *rip1* embryonic defects at indicated developmental stages.

| Genotype \ Stage                        | 16-32 cell        | Globular           | Heart              | Defect/Total | Percentage |
|-----------------------------------------|-------------------|--------------------|--------------------|--------------|------------|
| WT                                      | 2/115<br>(1.73%)  | 3/259<br>(1.16%)   | 2/224<br>(0.89%)   | 7/598        | 1.17 %     |
| <i>rip1</i>                             | 25/312<br>(8.01%) | 51/462<br>(11.04%) | 42/341<br>(12.32%) | 118/1115     | 10.58 %    |
| <i>rip1/RPI1<sub>pro</sub>:RPI1:GFP</i> | 2/98<br>(2.04%)   | 2/212<br>(0.94%)   | 2/185<br>(1.08%)   | 6/495        | 1.21 %     |
